# Supplementary material
Source: MDPI journal article supplement (https://www.mdpi.com/2311-7524/7/7/162)
Supplement: s1 [file s1]

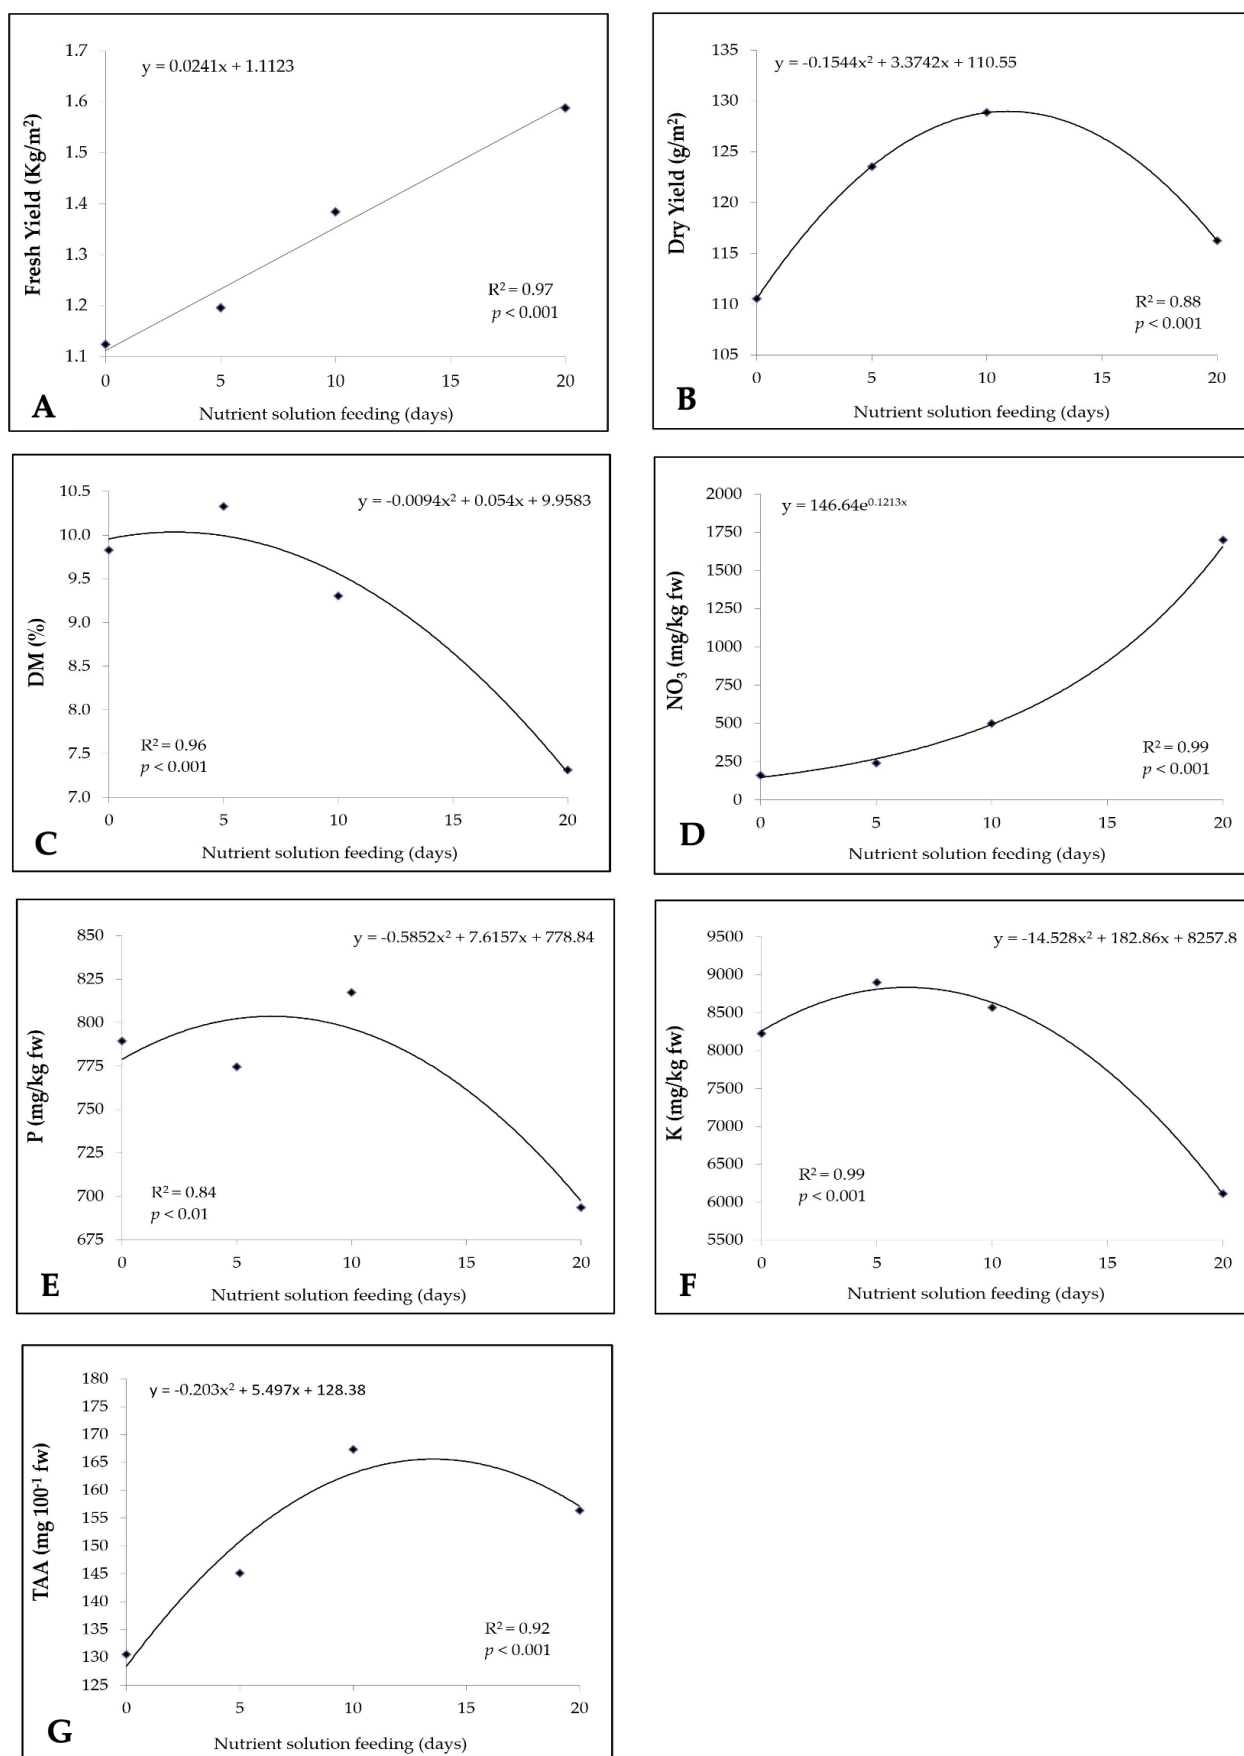

**Figure S1:** Relationships between the fresh yield (A), dry yield (B), fry matter percentage (C), nitrates concentration (D), P and K concentrations (E and F), and total ascorbic acid content (TAA) (G) in relation to nutrient solution feeding days.
